# Supplementary material
Source: PubMed Central journal article supplement (PMC5474806)
Supplement: pnas.1620811114.sapp.pdf [file pnas.1620811114.sapp.pdf]

## **SUPPLEMENTARY INFORMATION APPENDIX**

**Hawkes et al. Historical climate controls soil respiration responses to current soil moisture**

### **Supplementary Methods**

#### **Soil Biogeochemistry**

Total organic soil C was determined on air-dried soils acidified with H<sub>2</sub>SO<sub>3</sub> to remove inorganic carbonates and on litter samples run on an Apollo 9000 TOC analyzer with boat sampler (Teledyne Tekmar, Mason, OH). Inorganic N was extracted from soils using 2M KCl (1) and quantified colorimetrically (2, 3) on a DTX 880 microplate spectrophotometer (Beckman Coulter, Brea, CA, USA). Soil microbial biomass C was measured via chloroform fumigation and direct extraction with 0.5 M K<sub>2</sub>SO<sub>4</sub> (4, 5) and quantification by combustion on an Apollo 9000 TOC analyzer with liquid autosampler (Teledyne Tekmar, Mason, OH). Moisture content was determined gravimetrically by drying soil subsamples to constant weight at 105 °C. Soil pH was determined in a 1:1 slurry of soil and distilled water. Soil percent clay was quantified with the hydrometer method (6).

#### **Soil Microbial Community Characterization**

For analysis of microbial community composition, DNA was extracted from frozen soils in duplicate 0.25 g subsamples using MoBio PowerSoil extraction kits (MoBio Laboratories, Carlsbad, CA). DNA extracts were amplified with the universal SSU ribosomal primers 515F (7) and 907R (8) targeting the V4 hypervariable region, using Invitrogen Platinum PCR Supermix chemistry (Invitrogen, Carlsbad, CA, USA). The reverse primer was barcoded with a 12-base site-specific barcode sequence. Amplicons were cleaned using the MoBio UltraClean PCR Clean-Up kit (MoBio Laboratories, Carlsbad, CA) and quantified on a Bioanalyzer (Agilent Technologies, Loveland, CO, USA) before pooling equimolarly. Pooled libraries were purified of fragments < 150 bp in size using Agencourt AmPure XP magnetic beads (Beckman Coulter, Brea, CA). Samples were sequenced on a 454 GS FLX sequencer with titanium chemistry (Roche, Branford, CT) at the University of Texas Genome Sequencing and Analysis Facility.

We obtained 227,243 raw sequences, which were analyzed using QIIME v. 1.5.0 (9) and Mothur v.1.26.0 (10). Quality filtering was used to remove sequences with quality scores below 25, fewer than 150 bases, homopolymer runs of more than 10 bases, any ambiguous bases, or an anomalous barcode (any barcode that differed from the specified length by 1 bp or contained a mismatch). All singletons (unique to the entire dataset) were removed, and putative chimeras were removed with USEARCH 6.1 (11). Operational taxonomic units (OTUs) were defined at 97% sequence similarity using the UCLUST algorithm (11). Representative sequences from each OTU were searched against the SILVA v1.1.1 database (12) to identify and eliminate any non-bacterial taxa. To avoid bias in sampling effort, we rarefied to the sample with lowest sequencing depth after filtering (2490). All raw sequence data were deposited into the National Center for Biotechnology Information (NCBI) Sequence Read Archive and are available under the project accession number PRJNA379880.

44

45 **Lab Microcosm Moisture Response Tests for Field Experiments**

46 After the field common garden harvest, 15 g of air-dried soil (dry weight) from each of the 156  
47 cores was added to individual glass microcosms (67 ml vials) equipped with PTFE-silicone septa  
48 caps. Three cores in each factorial treatment combination were randomly assigned to each soil  
49 moisture treatment. After initial adjustment of soil water content, vials were sealed with  
50 Parafilm and allowed to equilibrate for 1 week at 24 °C. Thereafter, respiration rates were  
51 measured once every 2 weeks for 8 weeks. Soil moisture was adjusted weekly by weight to  
52 maintain treatments within 0.01%. After 8 weeks, microcosms were destructively harvested for  
53 the determination of microbial biomass C as described above.

54

55 Soils (15 g) from the field rainfall manipulation experiment were added to microcosms (67 ml  
56 vials as above) and maintained at 5 or 25% moisture for 8 weeks, with moisture adjusted by  
57 weight and soil respiration measured weekly. Vials were destructively harvested and sampled  
58 for microbial biomass C as described earlier. Note that we also sampled soils in the field plots  
59 from two plant communities in the rain treatments (tallgrass and shortgrass), but because there  
60 were no differences in respiration rates between them we collapse those data here for  
61 simplicity.

62

63 **Microcosm Headspace Sampling**

64 In all three lab incubations, microcosms were sealed for 2 to 24 hours (depending on volume)  
65 before 15 ml air samples were collected from the headspace of each microcosm through  
66 septum inserted in the lid. Headspace samples and standards for each time point were stored in  
67 12-ml borosilicate vials with butyl rubber septa until CO<sub>2</sub> was quantified on a SRI 8610C gas  
68 chromatograph (SRI Instruments, Santa Monica, CA).

69

## Supplementary Tables

**Table S1.** Gradient site information and experiments that used soils from these sites. Experiments are numbered as follows: (1) long-term reciprocal transplant lab microcosms, (2) field common gardens, and (3) field rainfall manipulation. Abbreviations are as follows: Lat = latitude, Lon = longitude, MAP = mean annual precipitation, T max = maximum annual temperature, T min = minimum annual temperature, Elev = site elevation, SOC = soil organic C, MBC = microbial biomass C when soils were collected in experiments 1, 2; Expt = experiment. Climate data are from the PRISM Climate Group using the 30-year record from 1981-2010 (Oregon State University, <http://prism.oregonstate.edu>). Sites are listed from high to low MAP.

| Site                                 | Site code | Lat.  | Lon.    | MAP (mm) | T max (°C) | T min (°C) | Elev (m) | pH  | SOC (%) | Clay (%) | MBC (mg g <sup>-1</sup> ) | Expt.   |
|--------------------------------------|-----------|-------|---------|----------|------------|------------|----------|-----|---------|----------|---------------------------|---------|
| Ladybird Johnson Wildflower Center   | WFC       | 30.18 | -97.88  | 886.8    | 26.3       | 13.6       | 244      | 7.9 | 5.5     | 26.7     | 1.255, 0.883              | 1, 2, 3 |
| SCO Ecolab                           | SCO       | 30.17 | -98.36  | 854.6    | 25.5       | 12.3       | 421      | 7.7 | 10.9    | 18.5     | 0.294                     | 2       |
| ING Ecolab                           | ING       | 30.33 | -98.45  | 852.3    | 25.6       | 12.4       | 385      | 7.4 | 2.4     | 15.3     | 0.476                     | 2       |
| Hill Country State Natural Area      | HCS       | 29.63 | -99.19  | 832.8    | 26.0       | 11.9       | 463      | 8.5 | 2.4     | 30.8     | 0.487                     | 1       |
| COL Ecolab                           | COL       | 30.33 | -98.44  | 814.2    | 25.8       | 12.5       | 382      | 8.1 | 3.2     | 20.6     | 0.902                     | 2       |
| Old Tunnel State Park                | OTS       | 30.10 | -98.82  | 812.3    | 24.8       | 11.1       | 521      | 8.7 | 5.1     | 40.0     | 1.236                     | 1       |
| Lost Maples State Natural Area       | LMS       | 29.83 | -99.59  | 796.5    | 25.0       | 11.4       | 641      | 7.9 | 4.8     | 40.4     | 0.957                     | 1       |
| Heart of the Hills Research Station  | HOH       | 30.18 | -99.35  | 762.2    | 24.8       | 10.6       | 604      | 7.6 | 4.7     | 41.1     | 0.774                     | 1       |
| SPE Ecolab                           | SPE       | 30.53 | -98.72  | 750.7    | 25.8       | 12.1       | 367      | 7.8 | 3.6     | 39.4     | 2.048                     | 1       |
| Kerr Wildlife Management Area        | KER       | 30.09 | -99.49  | 726.1    | 24.6       | 10.6       | 639      | 8.2 | 5.6     | 24.5     | 1.074                     | 1       |
| MOR Ecolab                           | MOR       | 29.74 | -100.10 | 631.6    | 26.7       | 13.3       | 433      | 8.2 | 4.1     | 34.9     | 0.573                     | 2       |
| Walter Buck Wildlife Management Area | WBW       | 30.43 | -99.80  | 606.0    | 25.5       | 11.1       | 620      | 8.0 | 4.7     | 38.0     | 0.737                     | 1       |
| SIE Ecolab                           | SIE       | 29.49 | -100.27 | 605.7    | 26.9       | 13.6       | 442      | 8.0 | 4.8     | 39.7     | 0.945                     | 2       |
| Kickapoo Caverns State Park          | KCS       | 29.62 | -100.44 | 604.7    | 26.3       | 12.9       | 555      | 8.2 | 4.2     | 47.6     | 2.086                     | 1       |
| Devils River State Natural Area      | DRS       | 29.94 | -100.92 | 536.0    | 26.7       | 12.4       | 557      | 8.2 | 2.4     | 42.2     | 1.274, 1.166              | 1, 2    |
| Seminole Canyon State Park           | SCS       | 29.69 | -101.32 | 442.3    | 27.5       | 13.9       | 427      | 8.1 | 5.7     | 31.9     | 0.154, 0.468              | 1, 2    |
| Fort Lancaster State Historic Site   | FLS       | 30.67 | -101.70 | 407.4    | 26.7       | 11.5       | 636      | 8.3 | 2.2     | 27.9     | 0.776                     | 1       |

**Table S2.** Repeated measures ANOVA for soil respiration in the long-term lab reciprocal moisture experiment as a function of home precipitation region (Region), site nested within region (Site(Region)), soil moisture treatment (Moisture), litter addition (Litter), and sample date (Date).

|                                   | df  | MS     | F       | P                |
|-----------------------------------|-----|--------|---------|------------------|
| <b>Between subjects</b>           |     |        |         |                  |
| Region                            | 2   | 0.1554 | 3.641   | 0.069            |
| Moisture                          | 3   | 0.3602 | 51.861  | <b>&lt;0.001</b> |
| Litter                            | 1   | 0.5524 | 86.090  | <b>&lt;0.001</b> |
| Site(Region)                      | 9   | 0.0427 | 26.748  | <b>&lt;0.001</b> |
| Region*Moisture                   | 6   | 0.0272 | 3.911   | <b>0.006</b>     |
| Region*Litter                     | 2   | 0.0193 | 3.012   | 0.100            |
| Moisture*Litter                   | 3   | 0.0753 | 19.236  | <b>&lt;0.001</b> |
| Moisture*Site(Region)             | 27  | 0.0069 | 4.353   | <b>&lt;0.001</b> |
| Litter*Site(Region)               | 9   | 0.0064 | 4.021   | <b>0.001</b>     |
| Region*Moisture*Litter            | 6   | 0.0058 | 1.493   | 0.229            |
| Moisture*Litter*Site(Region)      | 21  | 0.0039 | 2.452   | <b>0.003</b>     |
| Error                             | 69  | 0.0016 |         |                  |
| <b>Within subjects</b>            |     |        |         |                  |
| Date                              | 11  | 0.1788 | 111.122 | <b>&lt;0.001</b> |
| Date*Region                       | 22  | 0.0045 | 2.848   | <b>0.026</b>     |
| Date*Moisture                     | 33  | 0.0304 | 29.030  | <b>&lt;0.001</b> |
| Date*Litter                       | 11  | 0.0317 | 56.028  | <b>&lt;0.001</b> |
| Date*Site(Region)                 | 99  | 0.0016 | 6.652   | <b>&lt;0.001</b> |
| Date*Region*Moisture              | 66  | 0.0019 | 1.825   | <b>0.032</b>     |
| Date*Region*Litter                | 22  | 0.0009 | 1.668   | 0.165            |
| Date*Moisture*Litter              | 33  | 0.0052 | 8.578   | <b>&lt;0.001</b> |
| Date*Moisture*Site(Region)        | 297 | 0.0011 | 4.340   | <b>&lt;0.001</b> |
| Date*Litter*Site(Region)          | 99  | 0.0005 | 2.337   | <b>&lt;0.001</b> |
| Date*Region*Moisture*Litter       | 66  | 0.0005 | 2.376   | <b>0.001</b>     |
| Date*Moisture*Litter*Site(Region) | 231 | 0.0006 | 2.505   | <b>&lt;0.001</b> |
| Error(Date)                       | 759 | 0.0002 |         |                  |

**Table S3.** Results of repeated-measures ANOVA for soil respiration from the common garden lab incubation experiment as a function of region of soil origin (Region), common garden location (Garden), soil moisture treatment (Moisture), site nested in region (Site(Region)), date of sampling (Date), and their interactions. Microbial biomass, initial and final, were included as covariates. Factors significant at  $P < 0.05$  are in bold.

|                                   | df  | MS     | F      | P            |
|-----------------------------------|-----|--------|--------|--------------|
| Between subjects                  |     |        |        |              |
| Microbial Biomass Initial         | 1   | 0.0008 | 0.286  | 0.594        |
| Microbial Biomass Final           | 1   | 0.0010 | 0.341  | 0.560        |
| Region                            | 1   | 0.0639 | 35.415 | <b>0.004</b> |
| Garden                            | 1   | 0.0147 | 4.463  | 0.102        |
| Moisture                          | 1   | 0.0401 | 6.155  | 0.068        |
| Region*Garden                     | 1   | 0.0005 | 0.166  | 0.704        |
| Region*Moisture                   | 1   | 0.0003 | 0.042  | 0.849        |
| Garden*Moisture                   | 1   | 0.0025 | 3.425  | 0.138        |
| Region*Garden*Moisture            | 1   | 0.0048 | 6.658  | 0.061        |
| Site(Region)                      | 4   | 0.0018 | 0.607  | 0.659        |
| Garden*Site(Region)               | 4   | 0.0033 | 1.109  | 0.357        |
| Moisture*Site(Region)             | 4   | 0.0065 | 2.190  | 0.076        |
| Garden*Moisture*Site(Region)      | 4   | 0.0007 | 0.243  | 0.913        |
| Error                             | 95  | 0.0030 |        |              |
| Within subjects                   |     |        |        |              |
| Date                              | 3   | 0.0034 | 2.118  | 0.151        |
| Date*Microbial Biomass Initial    | 3   | 0.0043 | 1.534  | 0.206        |
| Date*Microbial Biomass Final      | 3   | 0.0024 | 0.872  | 0.456        |
| Date*Region                       | 3   | 0.0007 | 0.409  | 0.749        |
| Date*Garden                       | 3   | 0.0041 | 2.033  | 0.163        |
| Date*Moisture                     | 3   | 0.0031 | 1.181  | 0.358        |
| Date*Region*Garden                | 3   | 0.0033 | 1.629  | 0.235        |
| Date*Region*Moisture              | 3   | 0.0010 | 0.368  | 0.777        |
| Date*Garden*Moisture              | 3   | 0.0064 | 1.101  | 0.387        |
| Date*Region*Garden*Moisture       | 3   | 0.0001 | 0.010  | 0.999        |
| Date*Site(Region)                 | 12  | 0.0016 | 0.577  | 0.860        |
| Date*Garden*Site(Region)          | 12  | 0.0020 | 0.732  | 0.720        |
| Date*Moisture*Site(Region)        | 12  | 0.0026 | 0.955  | 0.493        |
| Date*Garden*Moisture*Site(Region) | 12  | 0.0058 | 2.085  | <b>0.018</b> |
| Error(Date)                       | 285 | 0.0028 |        |              |

**Table S4.** Results of repeated measures ANOVA for soil respiration ( $\mu\text{mol CO}_2 \text{ g}^{-1} \text{ h}^{-1}$ ) over 8 weeks for soils from the field rainfall experiment. Independent variables were field rain treatment (FieldRain; 1331 or 326  $\text{mm yr}^{-1}$ ), field plant community (FieldPlant; tallgrasses or shortgrasses), lab soil moisture treatment (LabMoist; 5 or 25%), and their interactions. Microbial biomass at the conclusion of the incubation experiment was included as a covariate. All *P* values reflect Greenhouse-Geisser correction (epsilon = 0.31); factors significant at *P* < 0.05 are in bold.

|                                    | df  | MS      | <i>F</i> | <i>P</i>         |
|------------------------------------|-----|---------|----------|------------------|
| Between subjects                   |     |         |          |                  |
| Microbial biomass                  | 1   | 0.00144 | 1.136    | 0.298            |
| FieldRain                          | 1   | 0.00030 | 0.240    | 0.629            |
| FieldPlant                         | 1   | 0.00173 | 1.368    | 0.254            |
| LabMoist                           | 1   | 0.04051 | 32.042   | <b>&lt;0.001</b> |
| FieldRain*LabMoist                 | 1   | 0.00061 | 0.482    | 0.494            |
| FieldRain*FieldPlant               | 1   | 0.00005 | 0.037    | 0.849            |
| FieldPlant*Moisture                | 1   | 0.00013 | 0.099    | 0.756            |
| FieldRain*FieldPlant*LabMoist      | 1   | 0.00027 | 0.217    | 0.646            |
| Error                              | 23  | 0.00126 |          |                  |
| Within subjects                    |     |         |          |                  |
| Date                               | 7   | 0.00131 | 2.848    | 0.064            |
| Date*Microbial biomass             | 7   | 0.00016 | 0.356    | 0.718            |
| Date*FieldPlant                    | 7   | 0.00036 | 0.79     | 0.468            |
| Date*FieldRain                     | 7   | 0.00070 | 1.534    | 0.225            |
| Date*LabMoist                      | 7   | 0.00364 | 7.943    | <b>0.001</b>     |
| Date*FieldPlant*FieldRain          | 7   | 0.00014 | 0.295    | 0.762            |
| Date*FieldPlant*LabMoist           | 7   | 0.00011 | 0.239    | 0.805            |
| Date*FieldRain*LabMoist            | 7   | 0.00088 | 1.915    | 0.155            |
| Date*FieldPlant*FieldRain*LabMoist | 7   | 0.00003 | 0.056    | 0.955            |
| Error(Date)                        | 161 | 0.00046 |          |                  |

**Table S5.** Results of PERMANOVA examining bacteria community composition as a function of region of soil origin (Region), common garden location (Garden), soil moisture treatment (Moisture), site nested in region (Site(Region)), and their interactions. Factors significant at  $P < 0.05$  are in bold. Full data are reported in Waring (33).

|                     | df  | MS    | <i>F</i> | $R^2$ | <i>P</i>     |
|---------------------|-----|-------|----------|-------|--------------|
| Region              | 1   | 1.526 | 1.447    | 0.031 | 0.225        |
| Garden              | 1   | 0.454 | 1.427    | 0.009 | 0.922        |
| Region*Garden       | 1   | 0.323 | 1.016    | 0.007 | 0.455        |
| Site(Region)        | 6   | 1.055 | 3.476    | 0.130 | <b>0.001</b> |
| Garden*Site(Region) | 4   | 0.318 | 10.495   | 0.026 | 0.054        |
| Error               | 128 | 0.303 |          |       |              |

**Table S6.** ANOVA results for initial microbial biomass from soils collected for the lab incubation experiment analyzed as a function of region of origin and site nested in region. Factors significant at  $P < 0.05$  are highlighted in bold.

|              | df | MS    | <i>F</i> | <i>P</i>         |
|--------------|----|-------|----------|------------------|
| Region       | 2  | 0.061 | 0.078    | 0.925            |
| Site(Region) | 9  | 0.780 | 16.596   | <b>&lt;0.001</b> |
| Error        | 12 | 0.047 |          |                  |



**Table S7.** ANOVA results for initial microbial biomass from the common garden harvest, measured prior to the lab incubation, analyzed as a function of region of origin, garden location, site nested in region, and their interactions. Factors significant at  $P < 0.05$  are highlighted in bold.

|                     | df  | MS    | <i>F</i> | <i>P</i>         |
|---------------------|-----|-------|----------|------------------|
| Region              | 1   | 2.088 | 1.093    | 0.355            |
| Garden              | 1   | 1.848 | 9.681    | <b>0.036</b>     |
| Region*Garden       | 1   | 0.004 | 0.020    | 0.893            |
| Site(Region)        | 4   | 1.911 | 12.665   | <b>&lt;0.001</b> |
| Garden*Site(Region) | 4   | 0.191 | 1.266    | 0.287            |
| Error               | 117 | 0.151 |          |                  |

**Table S8.** ANOVA results for final microbial biomass in the common garden lab incubation experiment. Independent variables were region of soil origin (Region), common garden location (Garden), soil moisture treatment (Moisture), site nested in region (Site(Region)), date of sampling (Date), and their interactions. Error mean squares and degrees of freedom are reported under each heading. Factors significant at  $P < 0.05$  are highlighted in bold.

|                              | df  | MS     | F      | P                |
|------------------------------|-----|--------|--------|------------------|
| Region                       | 1   | 0.34   | 0.077  | 0.796            |
| Garden                       | 1   | 34.988 | 63.847 | <b>0.001</b>     |
| Moisture                     | 1   | 11.651 | 5.599  | 0.077            |
| Region*Garden                | 1   | 0.135  | 0.246  | 0.646            |
| Region*Moisture              | 1   | 0.296  | 0.142  | 0.725            |
| Garden*Moisture              | 1   | 0.393  | 0.227  | 0.659            |
| Region*Garden*Moisture       | 1   | 1.066  | 0.615  | 0.477            |
| Site(Region)                 | 4   | 4.444  | 8.663  | <b>&lt;0.001</b> |
| Garden*Site(Region)          | 4   | 0.548  | 1.068  | 0.376            |
| Moisture*Site(Region)        | 4   | 2.081  | 4.057  | <b>0.004</b>     |
| Garden*Moisture*Site(Region) | 4   | 1.734  | 3.380  | <b>0.012</b>     |
| Error                        | 114 | 0.513  |        |                  |

**Table S9.** Results of three-way ANOVA for soil microbial biomass from the field rainfall experiment. Independent variables were: field rain treatment (FieldRain), field plant community (FieldPlant), lab moisture treatment (LabMoist), and their interactions. Error mean squares and degrees of freedom are reported under each heading. F-ratios significant at  $P < 0.05$  are in bold.

|                               | df | MS        | <i>F</i> | <i>P</i>     |
|-------------------------------|----|-----------|----------|--------------|
| FieldRain                     | 1  | 973.990   | 0.175    | 0.680        |
| FieldPlant                    | 1  | 60421.547 | 10.845   | <b>0.003</b> |
| LabMoist                      | 1  | 44416.958 | 7.972    | <b>0.009</b> |
| FieldRain*FieldPlant          | 1  | 281.025   | 0.050    | 0.824        |
| FieldRain*LabMoist            | 1  | 4102.544  | 0.736    | 0.399        |
| FieldPlant*LabMoist           | 1  | 17280.791 | 3.102    | 0.091        |
| FieldRain*FieldPlant*LabMoist | 1  | 2663.877  | 0.478    | 0.496        |
| Error                         | 24 | 5571.516  |          |              |

## Supplementary Figures

**Figure S1.** Map of sites across the Edwards Plateau (white outline) in Texas. Site codes refer to Table S1. Images are examples of sampling areas at the sites, with MAP indicated on each image (for full list of MAP, see Table S1). Photo credits: BGW except HCO, LMS = JDR; COL, MOR = J Fontenot; WFC = EW Connor. Map created using ggmap in R (34).

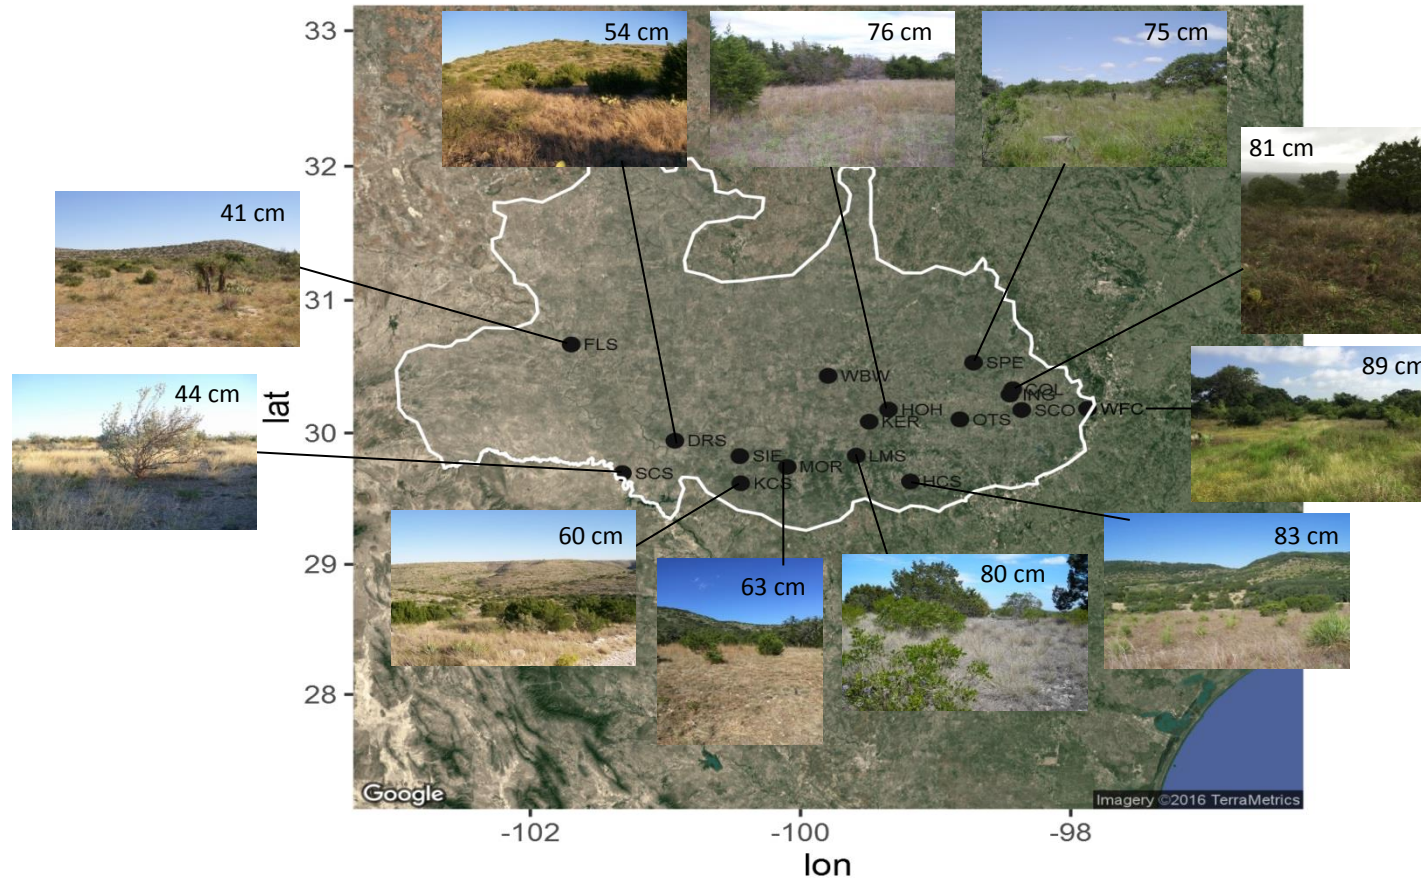

**Figure S2.** Soil respiration moisture response by site nested within region across the four moisture treatments. Litter elevated all respiration responses (note the difference in the y-axis scale for panels a-c and d-f), but the variation among sites was consistent. Site codes refer to Table S1.

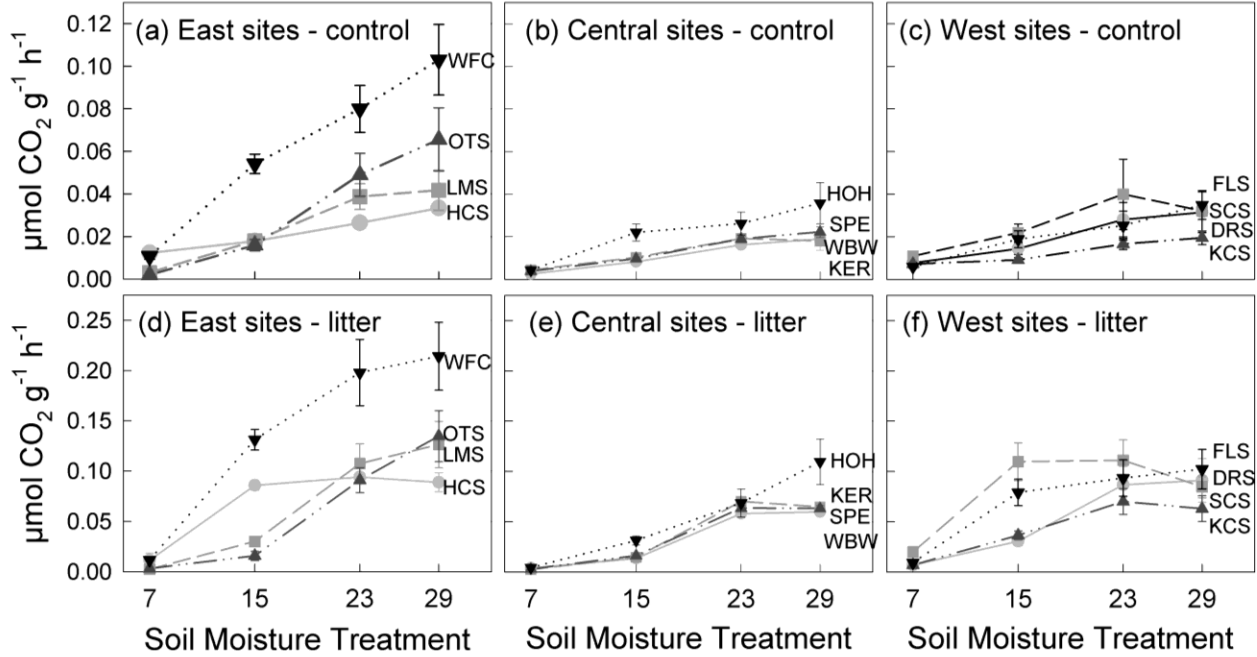

**Figure S3.** Soil respiration moisture response by region of origin for control microcosms (no litter added) across all 12 sample dates. Differences among regions were largely maintained over time, with eastern regions respiring more than others at 15, 23, and 29% soil moisture and western regions respiring more (or the same as) eastern regions at 7% soil moisture. However, the magnitude of differences among regions declined over time.

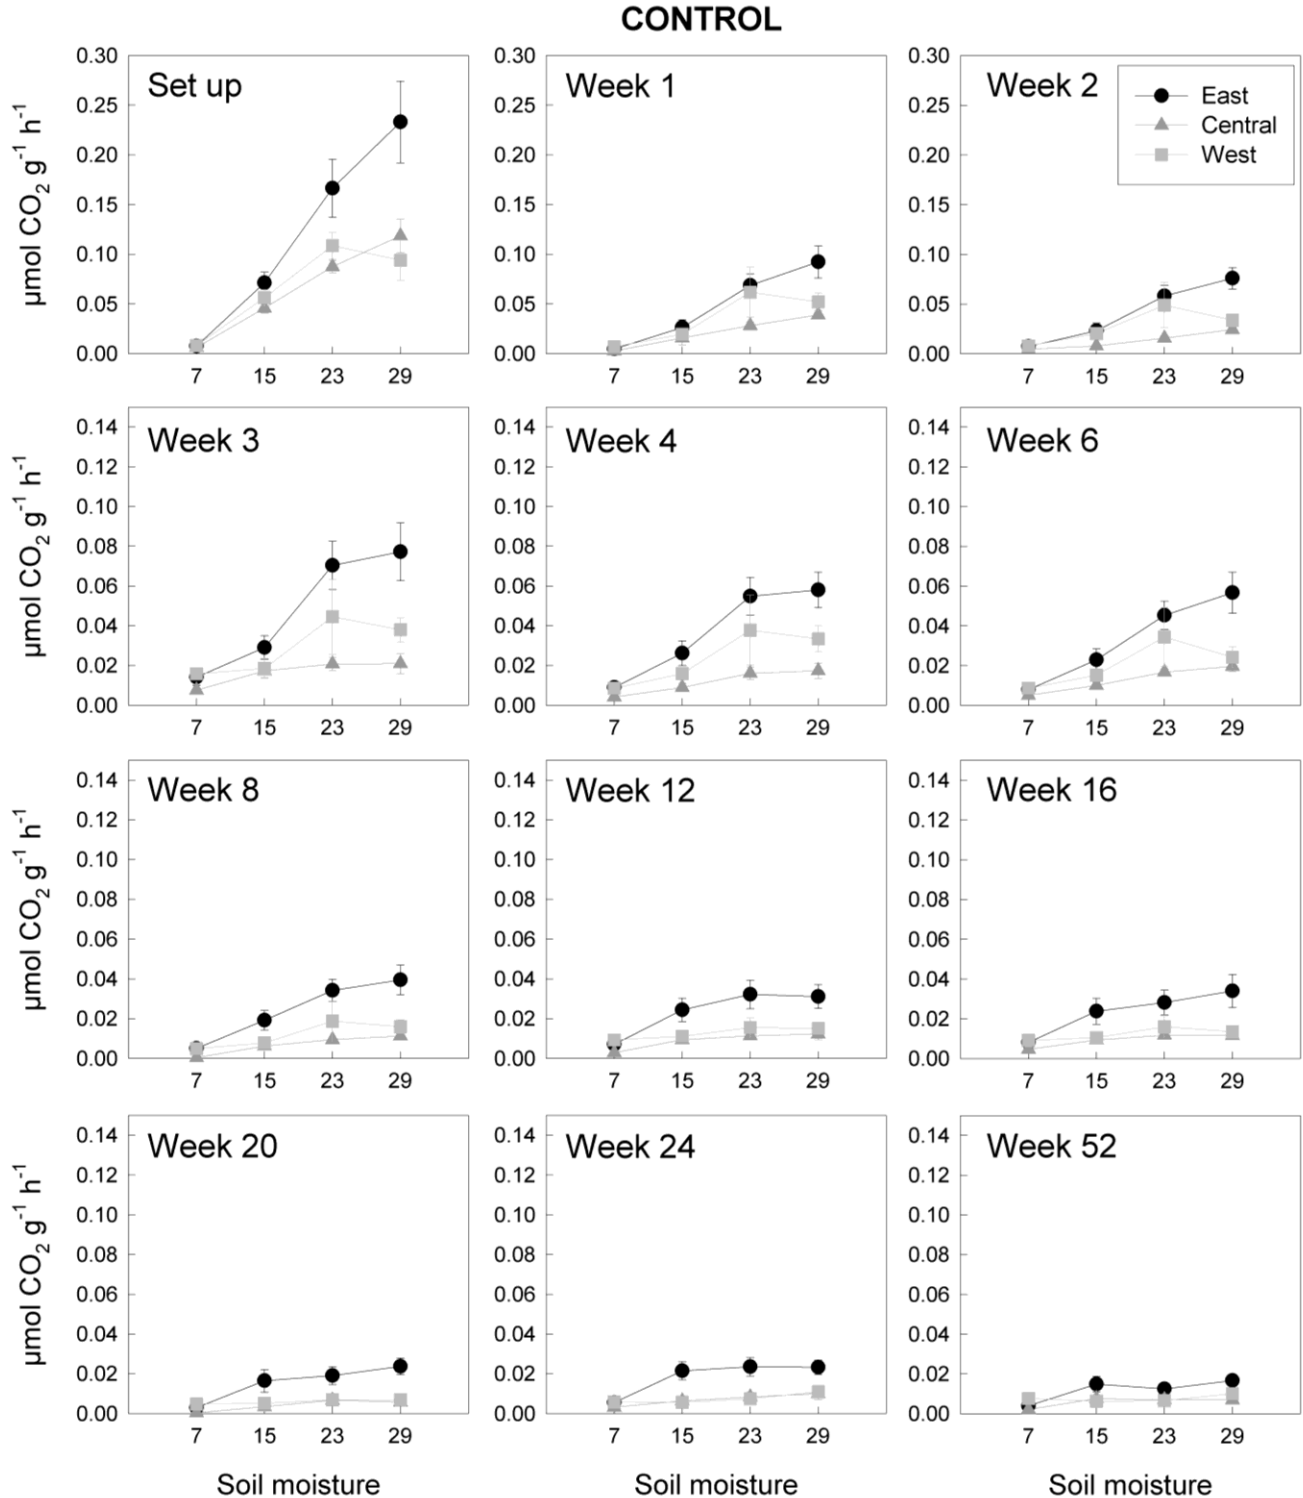

**Figure S4.** Soil respiration moisture response by region for litter addition microcosms across all 12 sample dates. Litter addition increased the overall respiration response when moisture was maintained at 15% or more, but did not affect respiration at 7% moisture and did not change the relative ranking of regions. The effect of litter declined over time.

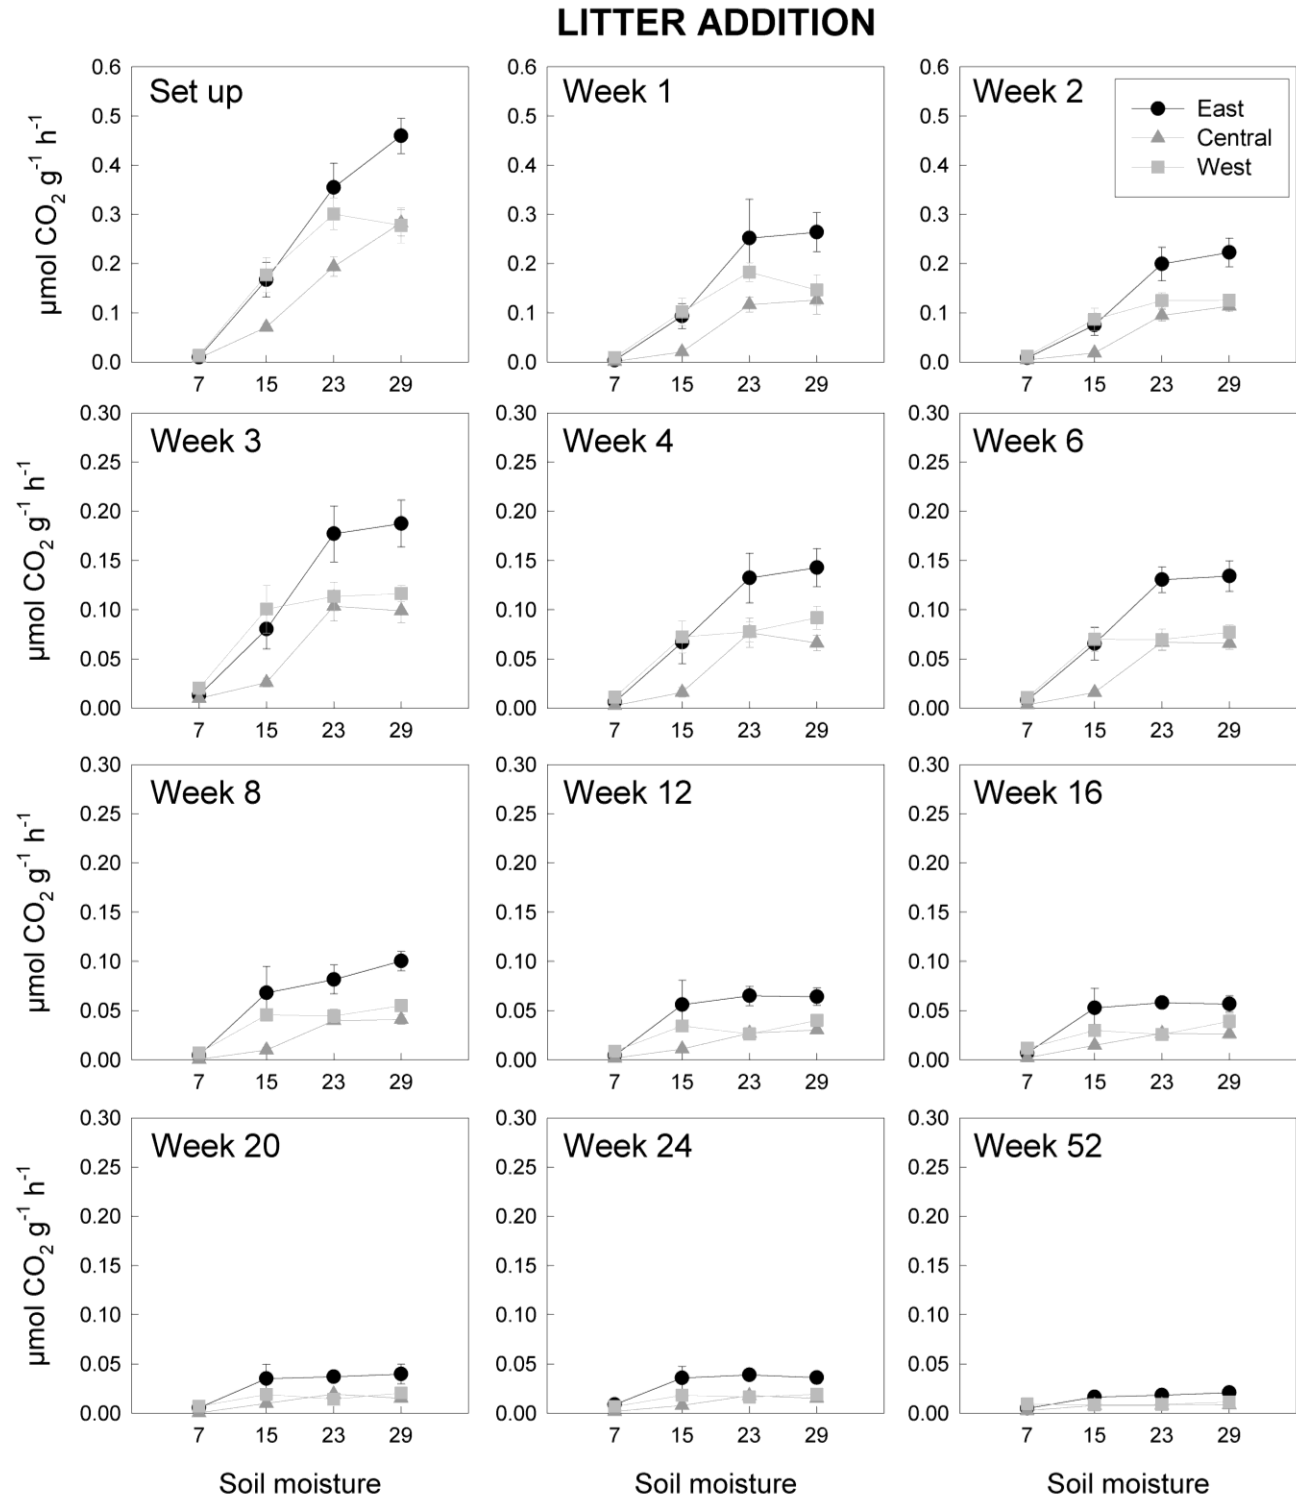

**Figure S5.** Field rainfall manipulation experiment at the WFC site. Photo credit: CVH.

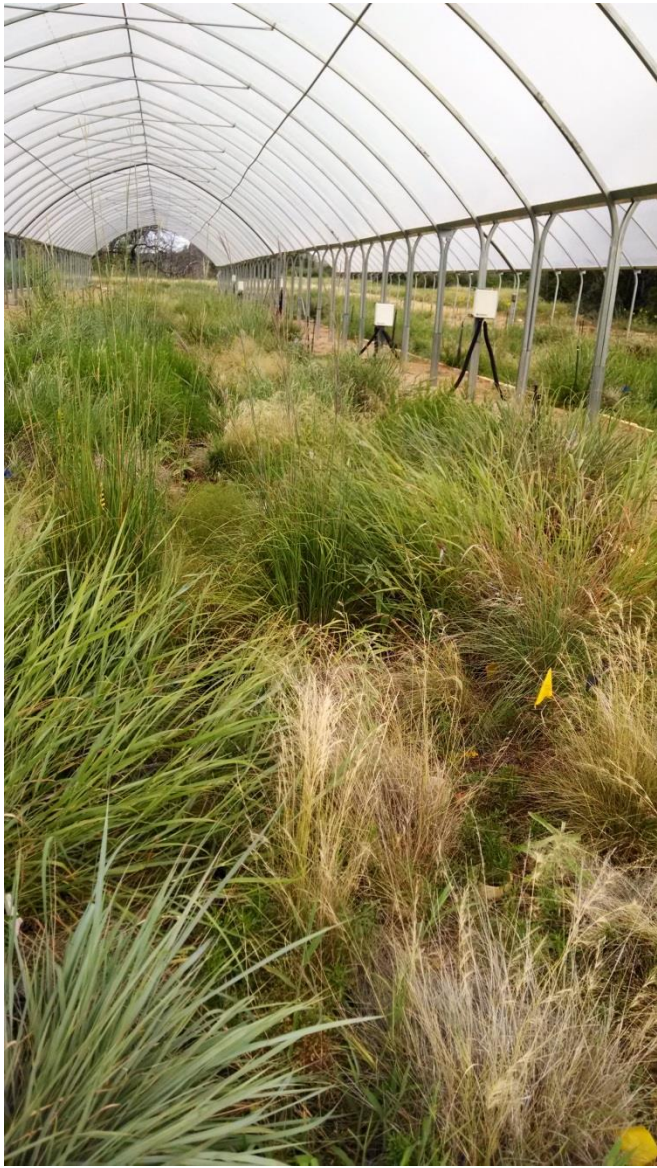



## Supplementary References

1. Keeney DR & Nelson DW (1982) Nitrogen - inorganic forms. *Methods of Soil Analysis, Part 2.*, eds Page AL, Miller RH, & Keeney DR (American Society of Agronomy, Madison, WI), pp 643-698.
2. Doane TA & Horwáth WR (2003) Spectrophotometric determination of nitrate with a single reagent. *Analytical Letters* 36(12):2713-2722.
3. Sims GK, Ellsworth TR, & Mulvaney RL (1995) Microscale determination of inorganic nitrogen in water and soil extracts. *Communications in Soil Science and Plant Analysis* 26(1-2):303-316.
4. Brooks PC, Landman AL, Pruden GP, & Jenkins DSJ (1985) Chloroform fumigation and the release of soil nitrogen: a rapid direct extraction method to measure microbial biomass in soil. *Soil Biology & Biochemistry* 17:837-842.
5. Scott-Denton LE, Rosenstiel TN, & Monson RK (2006) Differential controls by climate and substrate over the heterotrophic and rhizospheric components of soil respiration. *Global Change Biology* 12(2):205-216.
6. Bouyoucos GJ (1962) Hydrometer method improved for making particle size analyses of soils. *Agronomy Journal* 54(5):464-465.
7. Turner S, Pryer KM, Miao VPW, & Palmer JD (1999) Investigating deep phylogenetic relationships among cyanobacteria and plastids by small subunit rRNA sequence analysis. *Journal of Eukaryotic Microbiology* 46(4):327-338.
8. Lane DJ (1991) 16S/23S rRNA sequencing. *Nucleic acid techniques in bacterial systematics*, eds Stackebrandt E & Goodfellow M (John Wiley and Sons, New York, NY), pp 115-175.
9. Caporaso JG, *et al.* (2010) QIIME allows analysis of high-throughput community sequencing data. *Nature Methods* 7(5):335-336.
10. Schloss PD, *et al.* (2009) Introducing mothur: Open-source, platform-independent, community-supported software for describing and comparing microbial communities. *Applied and Environmental Microbiology* 75(23):7537-7541.
11. Edgar RC (2010) Search and clustering orders of magnitude faster than BLAST. *Bioinformatics* 26(19):2460-2461.
12. Quast C, *et al.* (2013) The SILVA ribosomal RNA gene database project: improved data processing and web-based tools. *Nucleic Acids Research* 41(D1):D590-D596.
